# Supplementary material
Source: MDPI journal article supplement (https://www.mdpi.com/1424-2818/15/3/389)
Supplement: s1 [file s1 › diversity-2195549-supplementary.pdf]

Fig. S1  
Supplemental Fig. S1. Trends for each site over all years

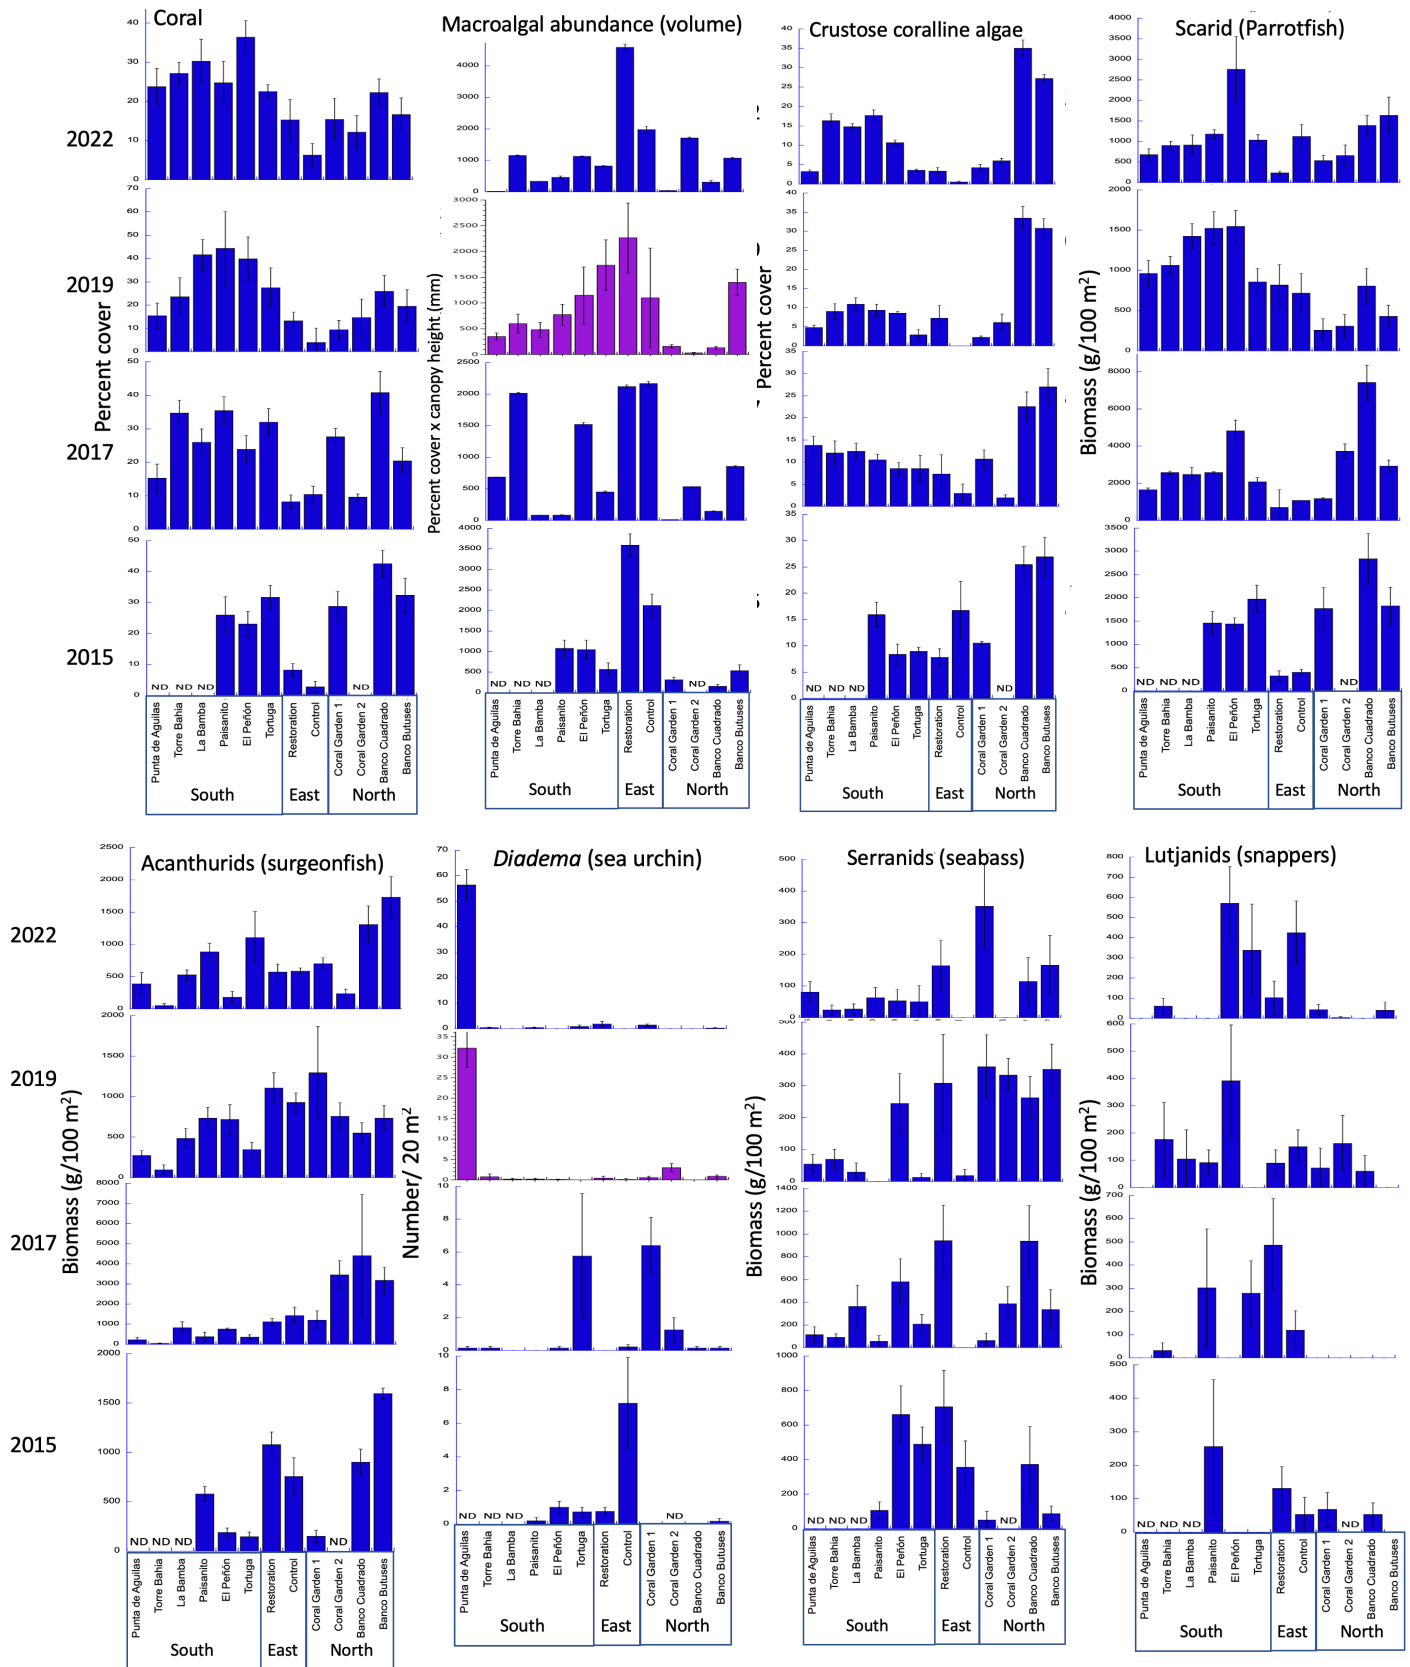



Fig. S2. Photographs from Montecristi region showing the effects of coral bleaching (2016) and hurricanes (September 2017)

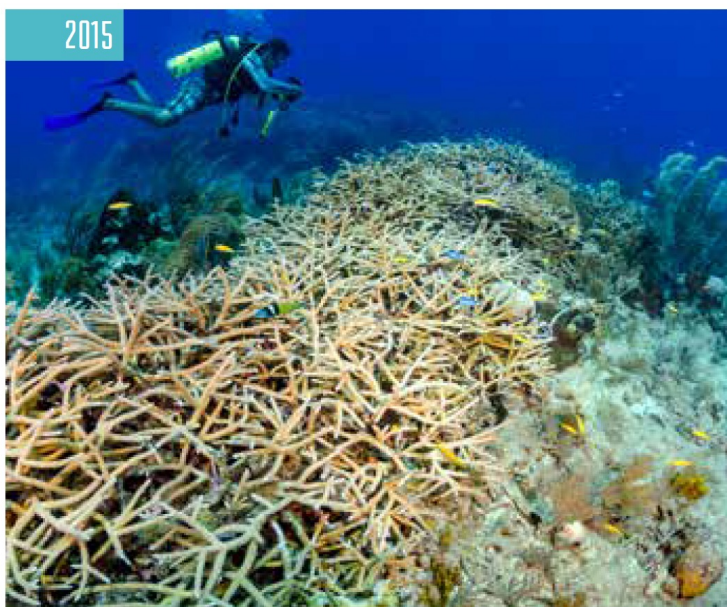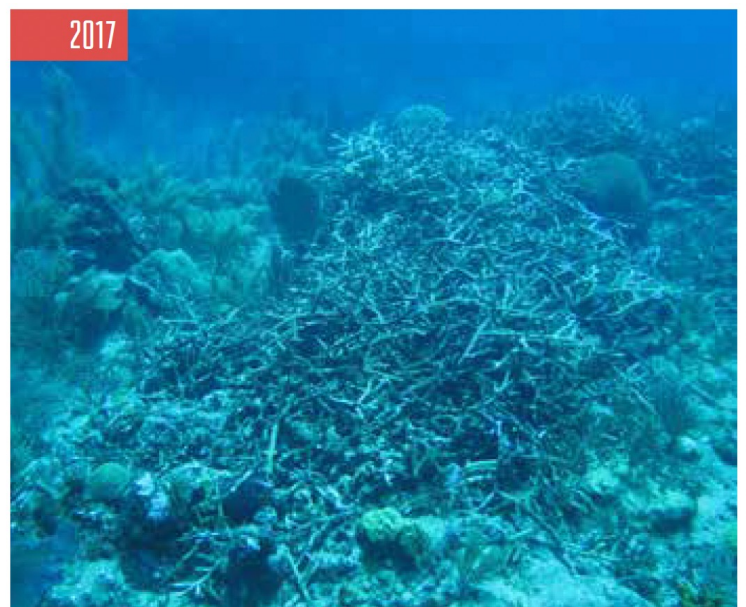

2016

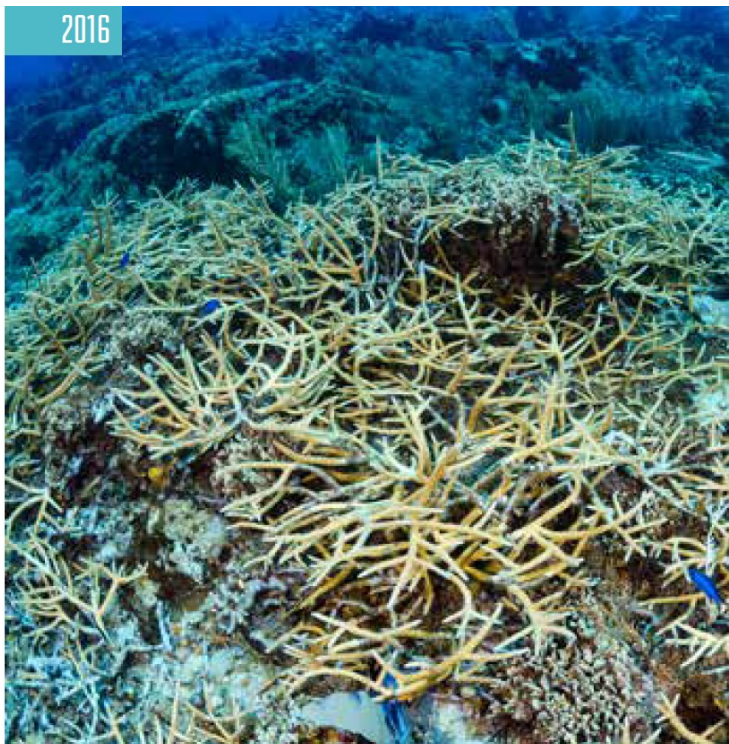

2018

A9

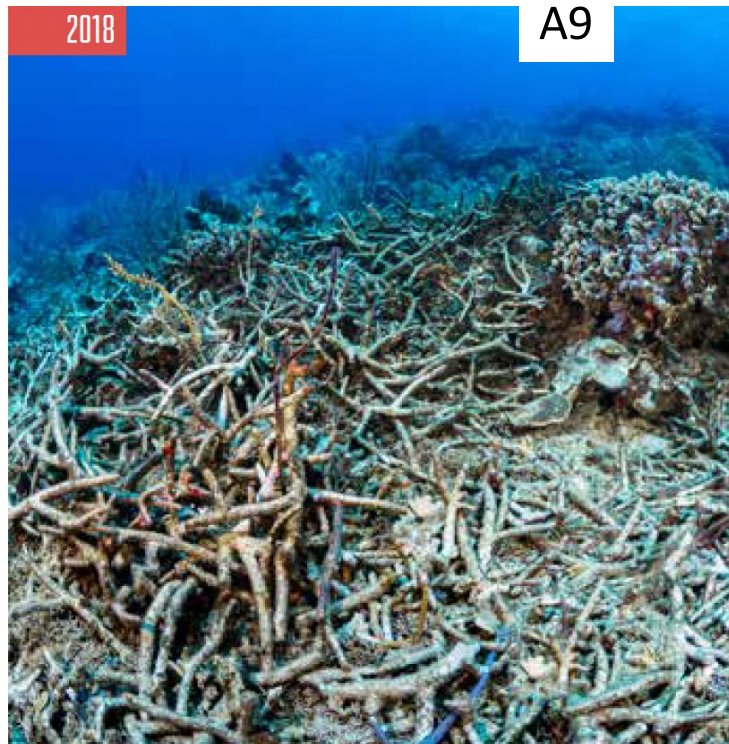

Banco Cuadrado - A. Cervicornis

2016

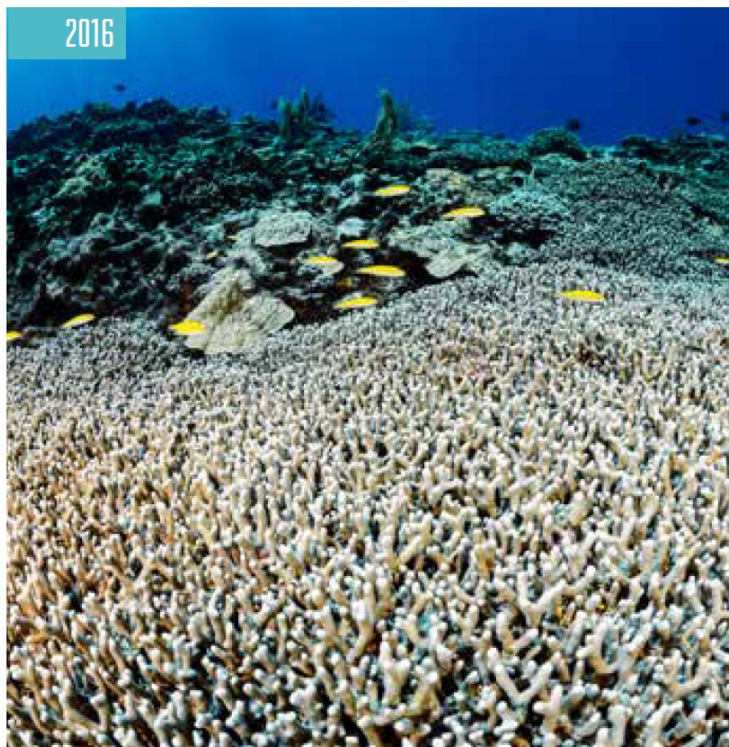

2018

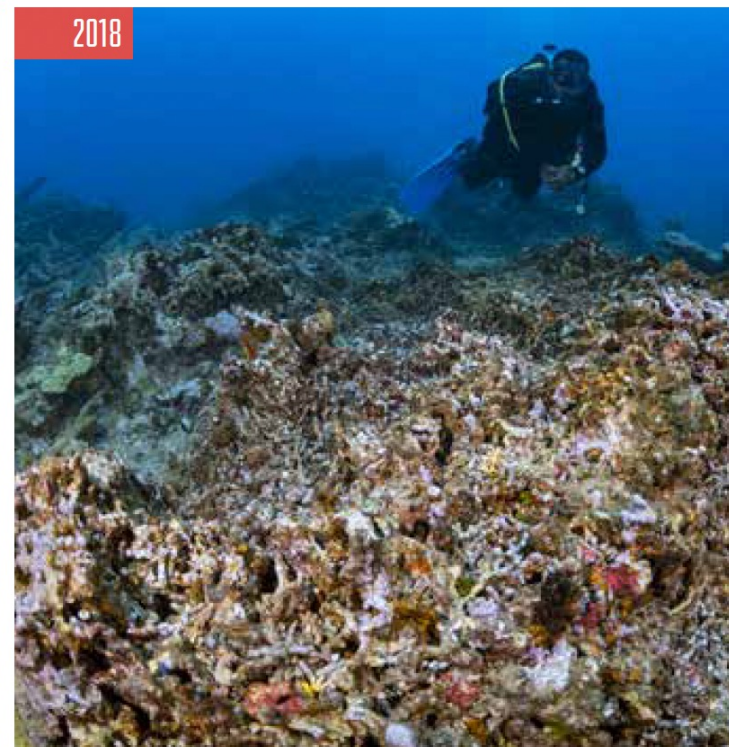

Banco Saxonia - Porites 1

2015

A9

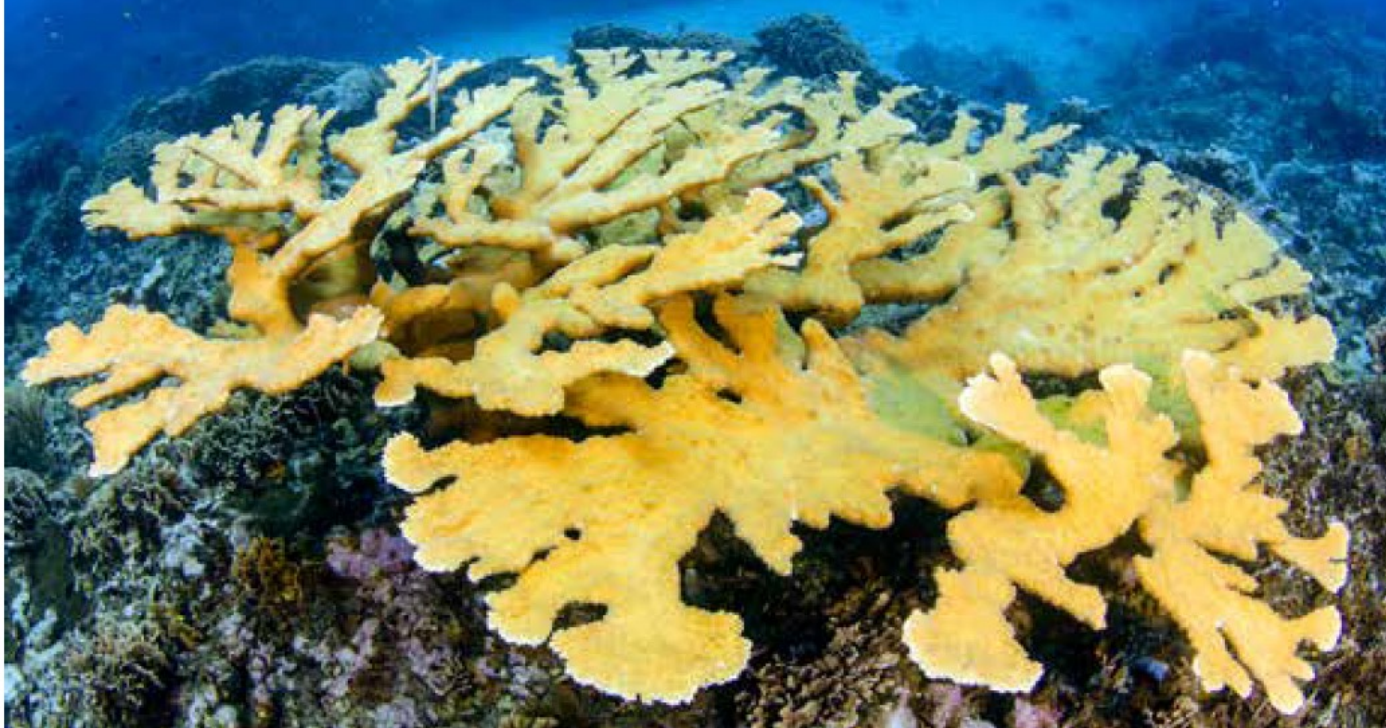

Banco Langosta - A. Palmata 3

2018

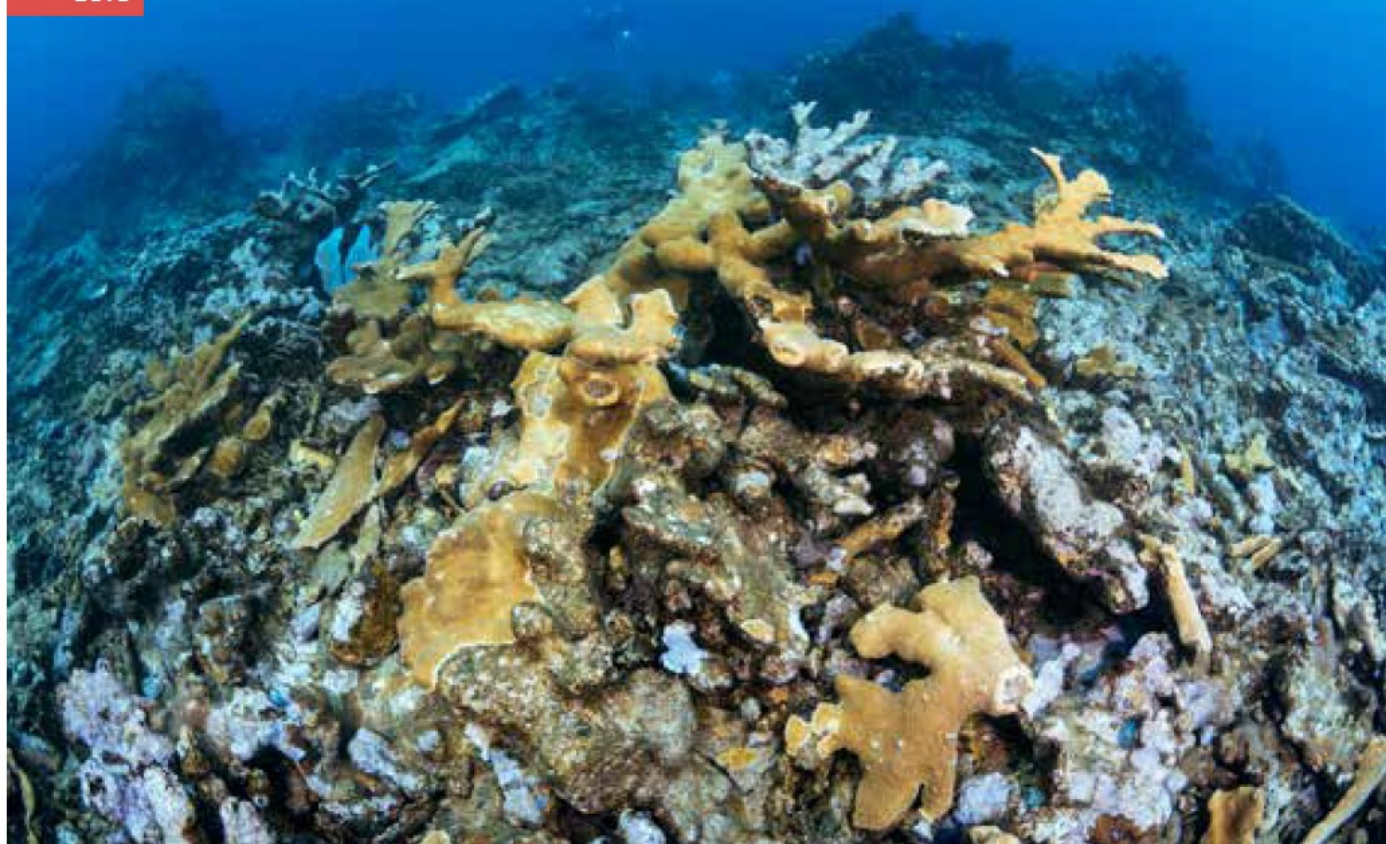

Banco Langosta - A. Palmata 3

## Supplemental Table A1

Average fish biomass (g/100 m<sup>2</sup>) per family for all years 2015 – 2022.

| Sectors | Regions/Sites              | Acanthurids<br>(surgeonfishes) | Carangids<br>(Jacks) | Lionfish | Lutjanids<br>(Snappers) | Parrotfishes | Scombrid<br>(tuna) | Serranids<br>(seabass -<br>coney,<br>graysby) | Sparids<br>(porgys) | Labrid<br>(wrasses) | Grand Total |
|---------|----------------------------|--------------------------------|----------------------|----------|-------------------------|--------------|--------------------|-----------------------------------------------|---------------------|---------------------|-------------|
| South   | Pedernales Punta Aguilas   | 390.5                          | 59.3                 | 203.7    | 0.0                     | 681.4        | 0.0                | 80.6                                          | 0.0                 | 0.0                 | 1415.6      |
|         | Pedernales Torre Bahia     | 49.3                           | 0.0                  | 0.0      | 60.2                    | 894.9        | 0.0                | 23.7                                          | 0.0                 | 0.0                 | 1028.2      |
|         | La Caleta Bomba            | 525.2                          | 0.0                  | 32.2     | 0.0                     | 911.7        | 0.0                | 26.0                                          | 0.0                 | 0.0                 | 1495.0      |
|         | La Caleta Paisanito        | 883.3                          | 50.2                 | 0.0      | 0.0                     | 1176.9       | 0.0                | 62.7                                          | 241.1               | 0.0                 | 2414.2      |
|         | Bayahibe-Peñon             | 183.9                          | 17.8                 | 0.0      | 571.1                   | 2758.4       | 3132.9             | 52.9                                          | 0.0                 | 0.0                 | 6717.1      |
|         | Bayahibe-Tortuga           | 1103.7                         | 206.1                | 0.0      | 338.4                   | 1032.5       | 0.0                | 50.6                                          | 0.0                 | 245.8               | 2977.2      |
| East    | Punta Cana Restoration     | 572.4                          | 0.0                  | 0.0      | 102.0                   | 229.5        | 0.0                | 164.3                                         | 0.0                 | 49.1                | 1117.4      |
|         | Punta Cana Control         | 583.9                          | 146.7                | 0.0      | 423.5                   | 1121.5       | 0.0                | 0.0                                           | 0.0                 | 0.0                 | 2275.5      |
| North   | Galeras Coral Garden 1     | 701.5                          | 34.6                 | 0.0      | 41.9                    | 536.6        | 0.0                | 351.6                                         | 0.0                 | 0.0                 | 1666.2      |
|         | Galeras Coral Garden 3     | 236.0                          | 0.0                  | 0.0      | 4.0                     | 650.5        | 0.0                | 0.0                                           | 0.0                 | 0.0                 | 890.5       |
|         | Montecristi Banco Cuadrado | 1306.7                         | 0.0                  | 0.0      | 0.0                     | 1385.5       | 0.0                | 113.9                                         | 0.0                 | 0.0                 | 2806.2      |
|         | Montecristi Banco Butuse   | 1730.1                         | 0.0                  | 0.0      | 39.8                    | 1630.0       | 0.0                | 164.9                                         | 0.0                 | 0.0                 | 3564.8      |
